# Supplementary material for: Oral delivery of a functional algal-expressed TGF-β mimic halts colitis in a murine DSS model
Source: PubMed Central journal article supplement (PMC8516079; doi:10.1016/j.jbiotec.2021.08.006), 2021-11-10

## Supplementary Material

### Supplementary Figure Legends

#### Supplementary Figure 1.

Nucleotide sequence of TGM1 as codon optimized for *C. reinhardtii* nuclear transcription. The *C. reinhardtii* ars1 Signal Peptide secretion sequence (90bp, 1-90, in orange) immediately precedes the 5-domain TGM1 mature sequence, labeled in blue, with the darker color for Domains 1-3 (741 bp, 91-831), and lighter blue for Domains 4 and 5 (480 bp, 832-1311) which are absent from the TrTGM1 construct. The 8-aa FLAG tag with a stop codon (27bp, 1312-1338), immediately after the TGM1 sequence, is labeled in mauve.

#### Supplementary Figure 2. Expression and Purification of Algal TGM1

**A.** Mass spectrometry coverage of FLAG-purified algal TGM1. Amino acid sequences highlighted in red are peptides identified from mass spectrometry; blue amino acids are cysteine residues that are alkylated post-reduction; green amino acid sequences are the potential glycosylation sites. The lysine (K) and arginine (R) residues are underlined as potential and identified sites of tryptic cleavage.

**B.** Anti-FLAG Western blot of FLAG-purified algal TGM1 digested with (+) and without (-) Endo H and with (+) and without (-) PNGase F endoglycosidases. Marker protein molecular weights are indicated.

#### Supplementary Figure 3. In vitro assays for TGF- $\beta$ activity.

**A.** MFB-F11 assay including WT algae protein controls, HEK-expressed and algal-expressed TGM1.

**B.** Foxp3 induction in CD4<sup>+</sup> T cells from a Foxp3-GFP transgenic reporter mouse by HEK-expressed and algal-expressed TGM1 and TrTGM1 in the presence or absence of IL-2 and retinoic acid (RA).

#### Supplementary Figure 4. Physiological responses to orally administered algal TGM1.

Mice given WT algal proteins, or algal-expressed TGM1 as shown in **Figure 3A** were monitored over 8 days for water intake (**A**), food consumed (**B**), and weight change (**C**).

#### Supplementary Figure 5. TGM1 administration during DSS-induced colitis.

**A.** Water intake over 14 days in each experimental group. Expression of ROR $\gamma$ t in Tregs from the MLN (**B**) and Peyer's Patches (**C**). UC = untreated control animals.

**Supplementary Table 1.** Protein yields of secreted algal material. Total protein amount of each sample was quantified by Pierce™ BCA Protein Assay Kit at 562 nm and standardized with 250 µg/mL, 500 µg/mL, 750 µg/mL and 1000 µg/mL bovine serum albumin. Algal TGM1 concentration in precipitated supernatant were quantified by western blot against 150 ng Recombinant Posi-Tag Epitope Tag Protein containing the epitope FLAG tag. Protein band pixel intensities were analyzed by Image Studio Lite.

|                                                                 | <b>Total protein concentration</b> | <b>Volume</b> | <b>sTGM concentration in total protein samples</b> |
|-----------------------------------------------------------------|------------------------------------|---------------|----------------------------------------------------|
| <b>Proteins purified from WT supernatant</b>                    | <b>10510 ng/µL</b>                 | <b>250 mL</b> | <b>0</b>                                           |
| <b>Protein purified from TGM1 transgenic strain supernatant</b> | <b>11850 ng/µL</b>                 | <b>220 mL</b> | <b>226 ng/µL</b>                                   |

**Supplementary Table 2. Glycosylation site analysis of algal TGM1.** A tryptic digest of algal TGM1 was analyzed by mass spectrometry for peptide identification and glycosylation site analysis. Data were analyzed using BioPharma Finder 4.0 software. Glycopeptides with a confidence value of > 80 %, and delta mass of 5 ppm were accepted. Glycosylated residues are highlighted by underlining of asparagine (N) or threonine (T). Cysteine residues alkylated as part of the sample processing are indicated by italics. Of the glycopeptides identified, a nonglycosylated counterpart peptide was only identified for N118. **Numbering corresponds to the mature amino acid sequence after cleavage of the 30-aa signal peptide** (See Supplementary Figure 2).

| <i>N or O glycosylation</i> | <i>Glycosylation site</i> | <i>Identification</i> | <i>Peptide sequence</i>                    | <i>Glycan</i> |
|-----------------------------|---------------------------|-----------------------|--------------------------------------------|---------------|
| N                           | N88                       | C112-K127             | CSPLPT <u>N</u> DTVSEYLYK                  | M5            |
| N                           | N88                       | C112-K127             | CSPLPT <u>N</u> DTVSEYLYK                  | M5            |
| N                           | N88                       | C112-K127             | CSPLPT <u>N</u> DTVSEYLYK                  | M4            |
| N                           | N88                       | C112-K127             | CSPLPT <u>N</u> DTVSEYLYK                  | M4            |
| N                           | N88                       | R111-K127             | RCSP <u>LPTN</u> DTVSEYLYK                 | M7            |
| N                           | N88                       | C112-K127             | CSPLPT <u>N</u> DTVSEYLYK                  | M5            |
| N                           | N88                       | C112-K127             | CSPLPT <u>N</u> DTVSEYLYK                  | M5            |
| N                           | N88                       | C112-K127             | CSPLPTNDTVSEYLYK                           | None          |
| N                           | N88                       | C112-K127             | CSPLPTNDTVSEYLYK                           | None          |
| N                           | N88                       | C112-K127             | CSPLPTNDTVSEYLYK                           | None          |
| N                           | N107                      | F136-K147             | F <u>N</u> ITVHPDASGK                      | A2G2          |
| N                           | N107                      | F136-K147             | F <u>N</u> ITVHPDASGK                      | A2G2          |
| N                           | ~N107                     | L115-K147             | LPTNDTVSEYLYKATVNP <u>GIIFN</u> ITVHPDASGK | A2G0F         |
| N                           | N255                      | P281-T296             | PLEA <u>N</u> ESVHYEYFTMT                  | A1G1F         |
| N                           | N255                      | P281-T296             | PLEA <u>N</u> ESVHYEYFTMT                  | A1G1F         |
| N                           | N255                      | P281-T296             | PLEA <u>N</u> ESVHYEYFTMT                  | A1G0F         |
| N                           | N255                      | P281-T296             | PLEA <u>N</u> ESVHYEYFTMT                  | A1G0F         |
| N                           | N255                      | P281-T294             | PLEA <u>N</u> ESVHYEYFTMT                  | A2G1B         |
| N                           | N267                      | S287-K302             | SVHYEYFTMT <u>N</u> ETDCK                  | A2G0B         |
| N                           | N267                      | S287-K302             | SVHYEYFTMT <u>N</u> ETDCK                  | A2G0B         |
| N                           | N267                      | V288-K302             | VHYEYFTMT <u>N</u> ETDCK                   | A2G1F         |
| N                           | ~N267                     | K280-K311             | KPLEANESVHYEYFTMT <u>N</u> ETDKKKGPPAKVGK  | A2G0F         |
| N                           | ~N267                     | K280-K311             | KPLEANESVHYEYFTMT <u>N</u> ETDKKKGPPAKVGK  | A2G0F         |
| O                           | ~T157                     | N160-C188             | NFPTDSNVQGHIIIGMCYNAEWQFSSTP <u>I</u> C    | GalNAc-3G     |
| O                           | ~T157                     | N160-C188             | NFPTDSNVQGHIIIGMCYNAEWQFSSTP <u>I</u> C    | GalNAc-3G     |

Smyth *et al.*, Supplementary Figure 1

ars1 SP

10 20 30 40 50  
 ATGCATGCAC GCAAGATGGG TGCCCTCGCG GTGCTCGCCG TCGCTTGCCT  
 60 70 80 90 100  
 CGCGGCAGTG GCATCGGTTG CGCATGCGGC CGACACCAAA GACGACAGCG  
 110 120 130 140 150  
 GCTGCATGCC CTTCAGCGAC GAGGCCGCCA CCTACAAGTA CGTGGCCAAG  
 160 170 180 190 200  
 GGCCCCAAGA ACATCGAGAT CCCCGCCAG ATCGACAACA GCGGCATGTA  
 210 220 230 240 250  
 CCCC GACTAC ACCCACGTGA AGCGCTTCTG CAAGGGCCTG CACGGCGAGG  
 260 270 280 290 300  
 ACACCACCG CTGGTTCGTG GGCATCTGCC TGGCCAGCCA GTGGTACTAC  
 310 320 330 340 350  
 TACGAGGGCG TGCAGGAGTG CGACGACCGC CGCTGCAGCC CCCTGCCAC  
 360 370 380 390 400  
 CAACGACACC GTGAGCTTCG AGTACCTGAA GGCCACCGTG AACCCCG  
 410 420 430 440 450  
 TCATCTTCAA CATCACCGTG CACCCCGACG CCAGCGGCAA GTACCCCG  
 460 470 480 490 500  
 CTGACCTACA TCAAGCGCAT CTGCAAGAAC TTCCCCACCG ACAGCAAC  
 510 520 530 540 550  
 GCAGGGCCAC ATCATCGGCA TGTGCTACAA CGCCGAGTGG CAGTTCAGCA  
 560 570 580 590 600  
 GCACCCCCAC CTGCCCCGCC AGCGGCTGCC CCCCCTGCC CGACGACGGC  
 610 620 630 640 650  
 ATCGTGTCT ACGAGTACTA CGGCTACGCC GCGGACCGCC ACACCGTGGG  
 660 670 680 690 700  
 CCCC GTGGT ACCAAGGACA GCAGCGGCAA CTACCC CAGC CCCACCCACG  
 710 720 730 740 750  
 CCGCCGCGC CTGCCGCGCC CTGAGCCAGG AGGCCGACCC CGGCGAGTTC  
 760 770 780 790 800  
 GTGGCCATCT GCTACAAGAG CGGCACCACC GCGGAGAGCC ACTGGGAGTA  
 810 820 830 840 850  
 CTACAAGAAC ATCGGCAAGT GCCCCGACCC CCGCTGCAAG CCCCTGGAGG  
 860 870 880 890 900  
 CCAACGAGAG CGTGCACTAC GAGTACTTCA CCATGACCAA CGAGACCGAC  
 910 920 930 940 950  
 AAGAAGAAGG GCCCCCCGC CAAGGTGGGC AAGAGCGGCA AGTACC  
 960 970 980 990 1000  
 GCACACCTGC GTGAAGAAGG TGTGCAGCAA GTGGCCCTAC ACCTGCA  
 1010 1020 1030 1040 1050  
 CCGCGGCC CATCTTCGGC GAGTGCATCG GCGCCACCTG GAACTTC  
 1060 1070 1080 1090 1100  
 GCCCTGATGG AGTGCATCAA CGCCGCGGC TGCAGCAGCG ACGACCTGTT  
 1110 1120 1130 1140 1150  
 CGACAAGCTG GGCTTCGAGA AGGTGATCGT GCGCAAGGGC GAGGGCAGCG  
 1160 1170 1180 1190 1200  
 ACAGCTACAA GGACGACTTC GCCCGCTTCT ACGCCACCGG CAGCAAGGTG  
 1210 1220 1230 1240 1250  
 ATCGCCGAGT GCGGCGGCAA GACCGTGCGC CTGGAGTGCA GCAACGGCGA  
 1260 1270 1280 1290 1300  
 GTGGCACGAG CCCGGCACCA AGACCGTGCA CCGCTGCACC AAGGACGGCA  
 1310 1320 1330  
 TCCGCACCCT GACTACAAG GACGACGACG ACAAGTAA

TGM-1  
Domains  
1-3

TGM-1  
Domains  
4+5

FLAG tag

Smyth *et al.*, Supplementary Figure 2

A

□ 1 **DDSGCMPFSD** **EAATYKYVAK** **GPKNIEIPAQ** **IDNSGMYPDY** **THVKRFCKGL**  
 51 HGEDTTGWFV GICLASQWYY YEGVQECDDR **RCSPLPTNDT** VSFEYLKATV  
 101 NPGIIFNITV HPDASGKYPE **LTYIKRICKN** FPTDSNVQGH IIGMCYNAEW  
 151 QFSSTPTCPA **SGCPPLPDDG** IVFYEYYGYA GDR**HTVGPVV** **TKDSSGNYP**  
**201 PTHARRCRA** LSQEADPGEF VAICYKSGTT GESHWEYYKN IGK**CPDPRCK**  
 251 PLEANESVHY EYFTMTNETD **KKKGPPAKVG** **KSGKYPEHTC** **VKKVCSKWPY**  
 301 **TCSTGGPIFG** **ECIGATWNFT** ALMECINARG **CSSDDLFDKL** GFEK**VIVRKG**  
**351 EGSDSYKDDF** **ARFYATGSKV** **IAECGGKTVR** LEC**SNGEWHE** PGTK**TVHRCT**  
 401 **KDGIRTL**

B

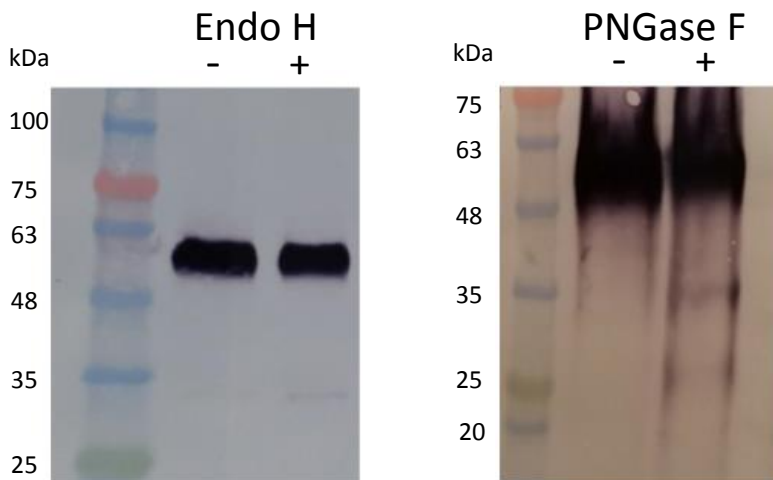

A

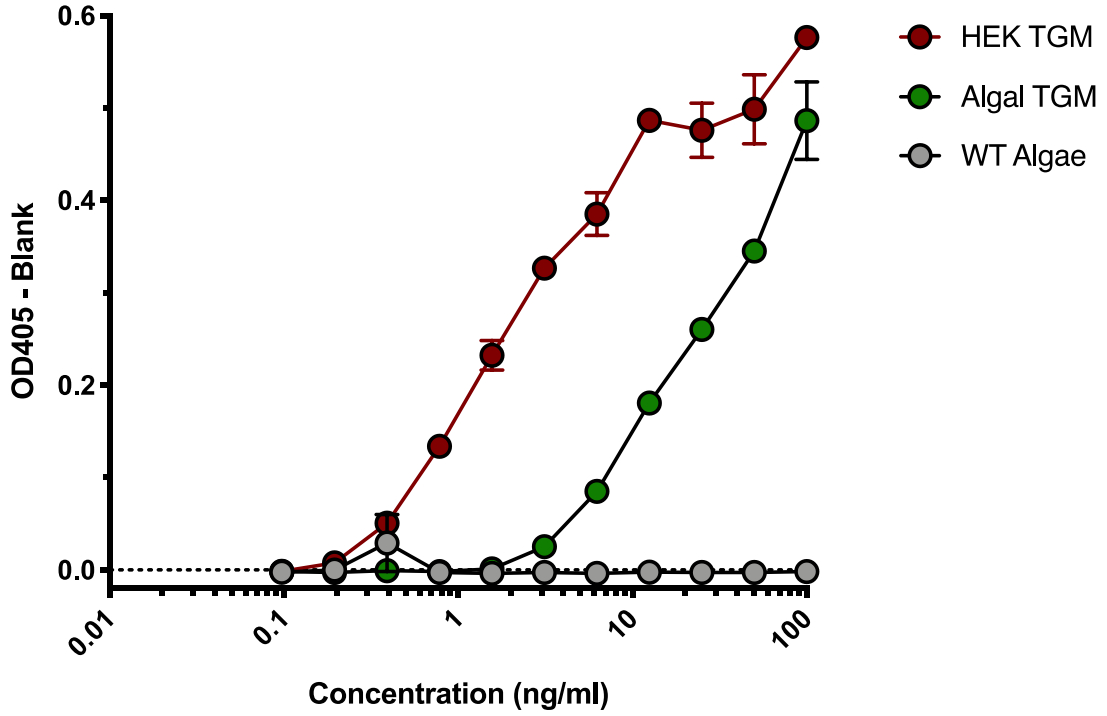

B

% Treg Induction with Retinoic Acid (RA)

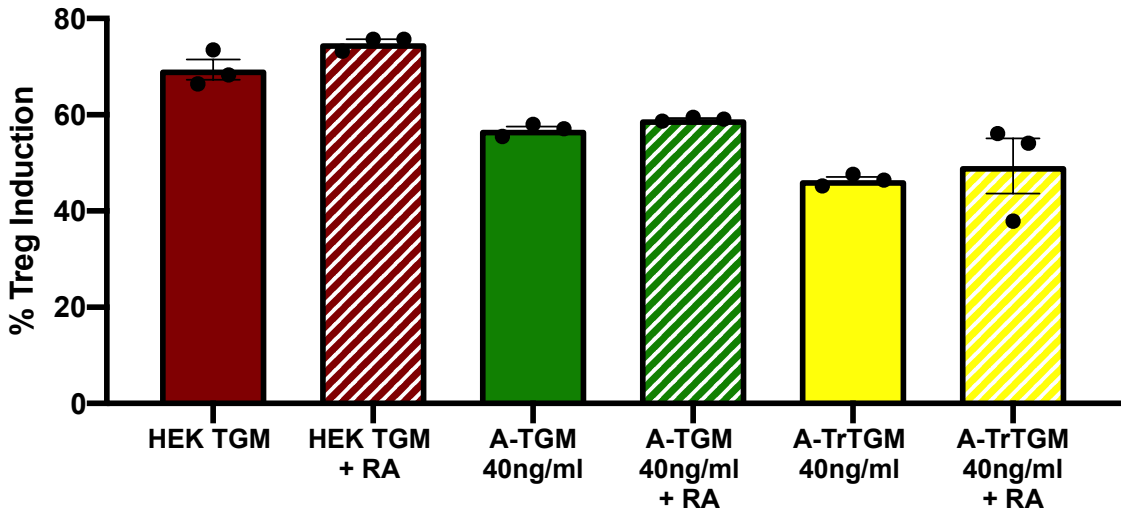

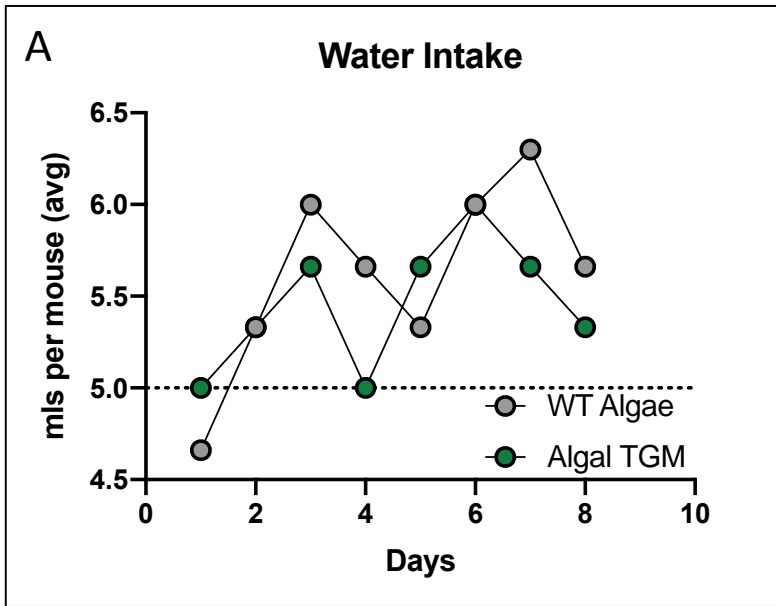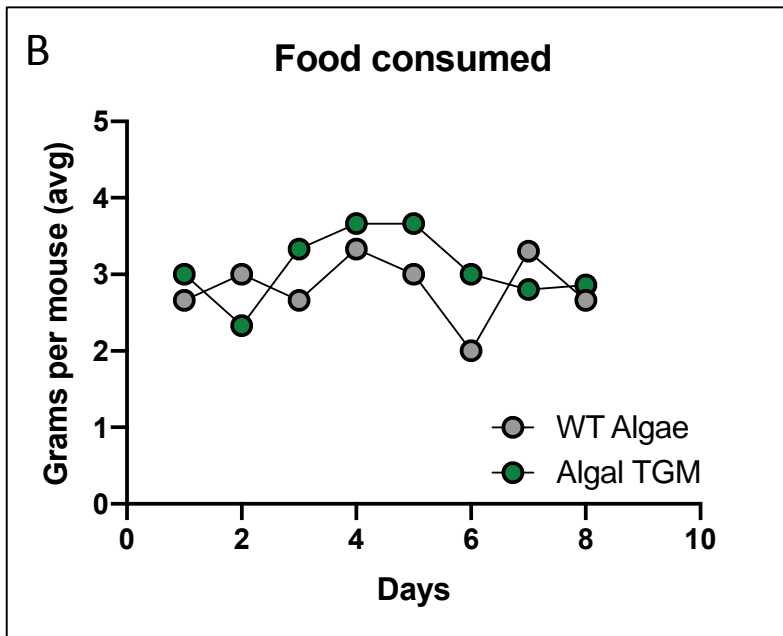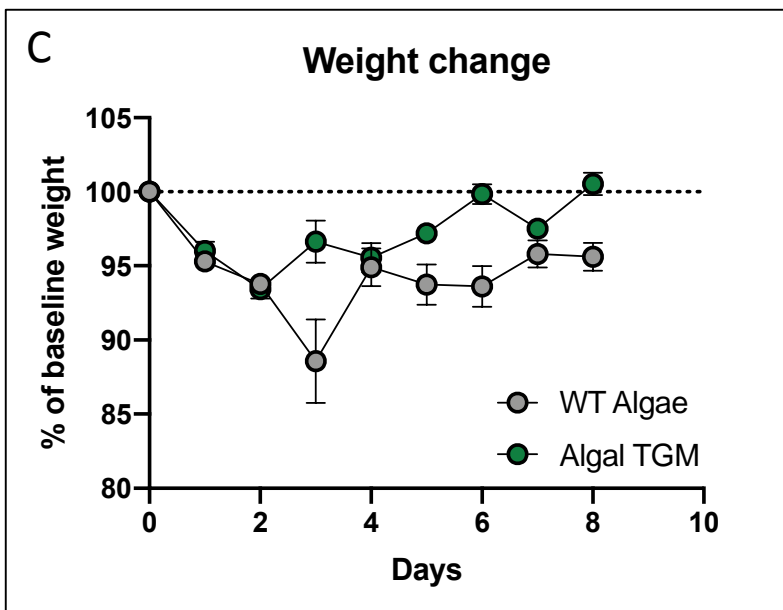

A

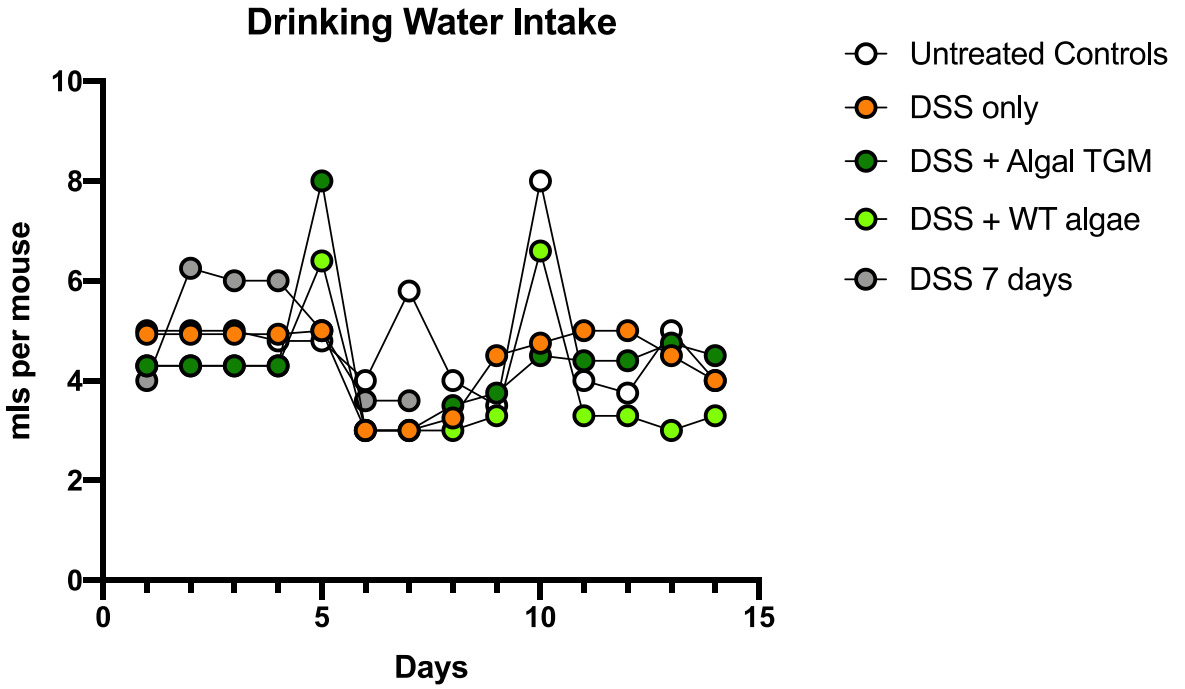

B

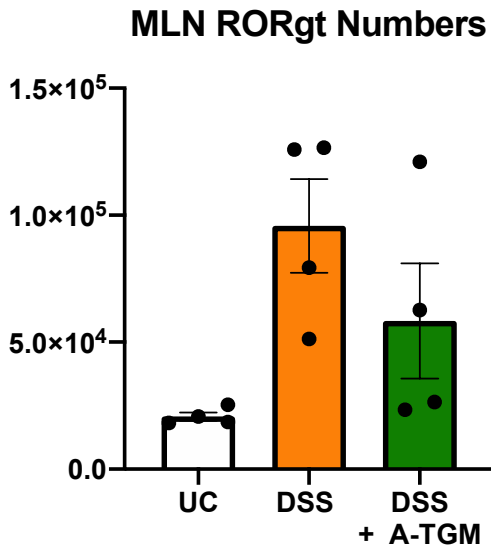

C

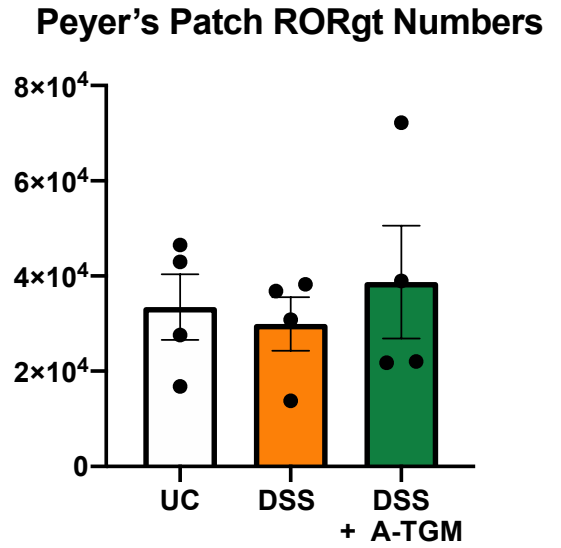

Supplement: mmc1.pdf [file mmc1.pdf]
